# Supplementary material
Source: PubMed Central journal article supplement (PMC4344149)
Supplement: rspb20142515supp1.pdf [file rspb20142515supp1.pdf]

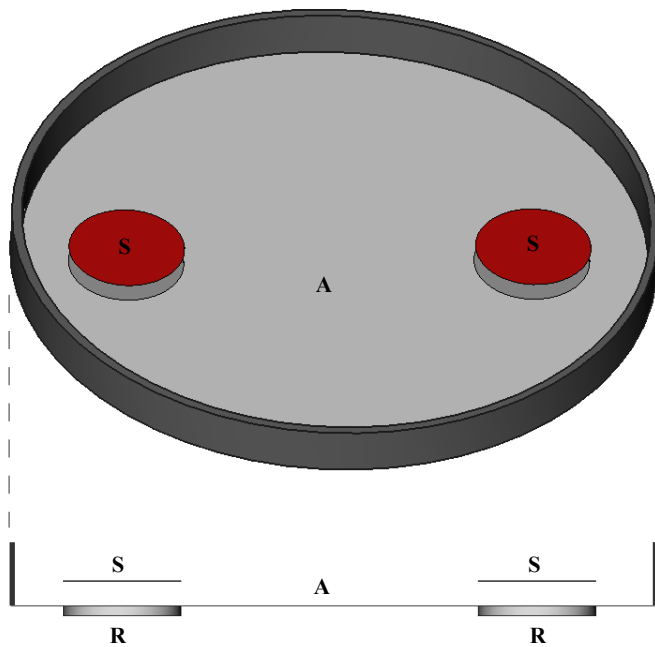

ESM1: Design of the experimental setup in a perspective and lateral view. A: Arena of the setup; S: Shelters with red filter; R: RFID reader.

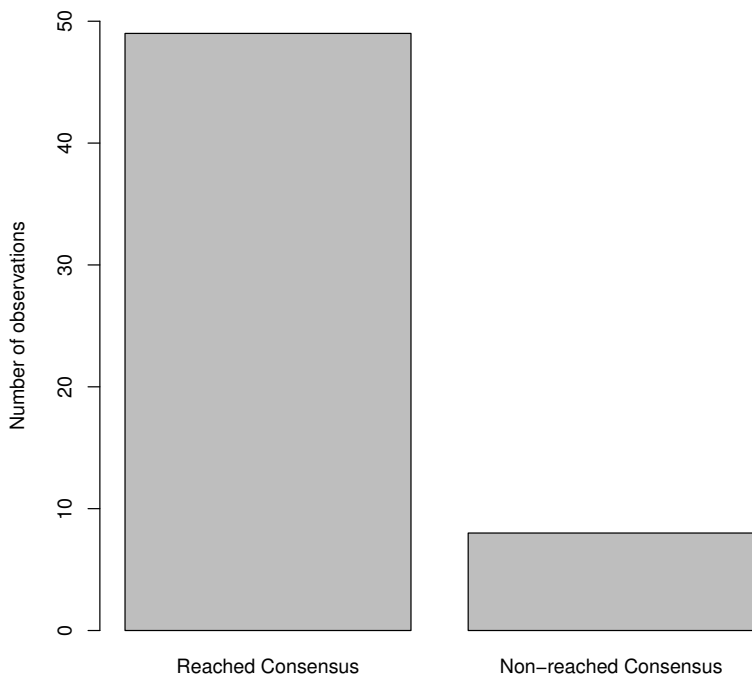

ESM2: Number of observations for reached consensus (there is a significant greater population under one shelter than the other one) or not reached consensus (not significant number of cockroaches aggregated under each shelter) at the end of experiments (N = 57).

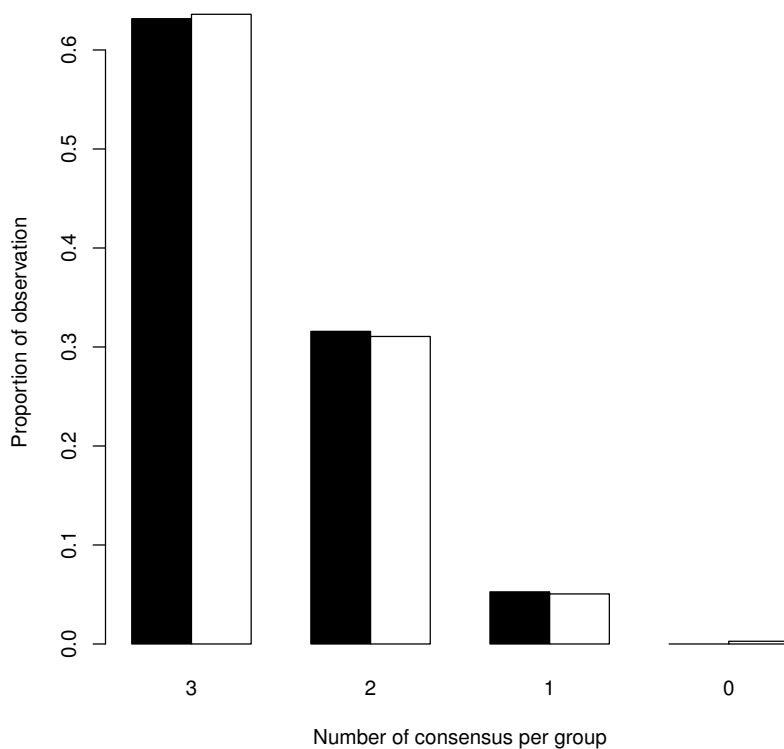

ESM3: Proportion of groups that reached a consensus every day (3), twice (2), once (1) or never (0) along the 3 trials (N = 19). Black bars for observed proportions and white bars for the theoretical distribution assuming a  $\Pi = 0.86$  for all groups (eq. 2).
